# Supplementary material for: TP53 mutants and non-HPV16/18 genotypes are poor prognostic factors for concurrent chemoradiotherapy in locally advanced cervical cancer
Source: Sci Rep. 2021 Sep 28;11:19261. doi: 10.1038/s41598-021-98527-2 (PMC8478905; doi:10.1038/s41598-021-98527-2)
Supplement: Supplementary file 4 — Supplementary Tables. [file 41598_2021_98527_MOESM4_ESM.xlsx]

## Sheet: Table S1
Table S1. Correlation between clinico-pathological factors with prognosis in patients with locally advanced cervical cancer
(A) Overall survival
Variable	Univariate			Multivariate*
	Hazard ratio	P value		Hazard ratio	P value
Age (≥60/<60)	1.59(0.66-3.82)	0.3		1.17 (0.45-3.09)	0.75
FIGO Stage (IV/III)	0.37(0.09-1.57)	0.18		0.34 (0.07-1.54)	0.16
Histology (Non-SCC/SCC)	1.61(0.38-6.90)	0.52		1.18 (0.26-5.37)	0.83
Lymph node metastasis (positive/negative)	1.26(0.57-2.77)	0.56		1.49 (0.64-3.51)	0.36
Treatment (RT/CCRT)	1.95(0.86-4.43)	0.11		2.27 (0.95-5.43)	0.066
Tumor size (≥70mm/<70mm)	2.22(0.98-5.04)	0.056		2.75 (1.15-6.55)	0.023
(B) Loco-regional relapse-free survival
Variable	Univariate			Multivariate*
	Hazard ratio	P value		Hazard ratio	P value
Age (≥60/<60)	1.13(0.51-2.52)	0.77		0.88 (0.37-2.09)	0.77
FIGO Stage (IV/III)	0.57(0.17-1.89)	0.36		0.46 (0.13-1.62)	0.23
Histology (Non-SCC/SCC)	2.56(0.75-8.70)	0.13		1.92 (0.54-6.75)	0.31
Lymph node metastasis (positive/negative)	1.18(0.50-2.51)	0.67		1.11 (0.50-2.44)	0.8
Treatment (RT/CCRT)	1.76(0.79-3.93)	0.17		2.28 (0.95-5.48)	0.066
Tumor size (≥70mm/<70mm)	2.23(1.00-4.97)	0.051		3.08 (1.26-7.53)	0.014
*Cox proportional hazards regression analysis

## Sheet: Table S2
Table S2. Distribution of somatic mutation between our study and TCGA datasets.
Variable	Our study			TCGA dataset		p value*
	(n=70)			(n=54)
	n	(%)		n	(%)
PIK3CA mutant	36	51.4		17	31.5	0.029
FBXW7 mutant	7	10		8	14.8	0.42
PTEN mutant	5	7.1		8	14.8	0.24
TP53 mutant	4	5.7		7	13	0.21
*Fisher's exact test

## Sheet: Table S3
Table S3. No correlation between other genomic alteration and survival in locally advanced cervical cancer
(A) Progression-free survival
Genomic alteration	Univariate			Multivariate*
	Hazard ratio	P value		Hazard ratio	P value
PIK3CA mutation (n=36)	1.12(0.58-2.13)	0.74		1.25 (0.65-2.41)	0.5
FBXW7 mutation (n=7)	2.08(0.86-5.04)	0.1		2.30 (0.94-5.61)	0.067
PTEN mutation (n=5)	1.46(0.45-4.77)	0.53		1.03 (0.31-3.49)	0.96
(B) Overall survival
Genomic alteration	Univariate			Multivariate*
	Hazard ratio	P value		Hazard ratio	P value
PIK3CA mutation (n=36)	1.31(0.59-2.89)	0.5		1.39 (0.62-3.08)	0.42
FBXW7 mutation (n=7)	2.63(0.98-7.06)	0.056		2.80 (1.04-7.56)	0.042
PTEN mutation (n=5)	2.48(0.74-8.32)	0.14		1.76 (0.49-6.34)	0.39
(C) Loco-regional relapse-free survival
Genomic alteration	Univariate			Multivariate*
	Hazard ratio	P value		Hazard ratio	P value
PIK3CA mutation (n=36)	1.06(0.50-2.26)	0.88		1.19 (0.55-2.56)	0.66
FBXW7 mutation (n=7)	2.15(0.81-5.73)	0.13		2.35 (0.88-6.32)	0.09
PTEN mutation (n=5)	1.82(0.55-6.07)	0.33		1.34 (0.38-4.739	0.65
*Cox proportional hazards regression analysis adjusting for tumor size.

## Sheet: Table S4
Table S4. Correlation between TP53 mutation and prognosis in patients with locally advanced cervical cancer
(A) Overall survival
Variable	Univariate			Multivariate*
	Hazard ratio	P value		Hazard ratio	P value
Lymph node metastasis (positive/negative)	1.26(0.57-2.77)	0.56		-
Treatment (RT/CCRT)	1.95(0.86-4.43)	0.11		-
Tumor size (≥70mm/<70mm)	2.22(0.98-5.04)	0.056		2.29 (1.00-5.20)	0.049
TP53 mutation (n=4)	2.12(0.49-9.21)	0.31		2.29 (0.52-9.98)	0.27
(B) Loco-regional relapse-free survival
Variable	Univariate			Multivariate*
	Hazard ratio	P value		Hazard ratio	P value
Lymph node metastasis (positive/negative)	1.18(0.5-2.51)	0.67		-
Treatment (RT/CCRT)	1.76(0.79-3.93)	0.17		-
Tumor size (≥70mm/<70mm)	2.23(1.00-4.97)	0.051		2.39 (1.06-5.39)	0.036
TP53 mutation (n=4)	2.80(0.65-12.08)	0.17		3.41 (0.77-15.06)	0.1
*Stepwise multiple regression analysis

## Sheet: Table S5
Table S5. Correlation between HPV genotype and prognosis in patients with locally advanced cervical cancer (n= 65)
(A) Overall survival
Variable	Univariate			Multivariate*
	Hazard ratio	P value		Hazard ratio	P value
Tumor size (≥70mm/<70mm)	2.04 (0.86-4.81)	0.11		1.87 (0.78-4.45)	0.16
HPV genotype (non HPV16 or 18/HPV16 or 18)	2.13 (0.93-4.88)	0.074		2.01 (0.87-4.63)	0.1
(B) Loco-regional relapse-free survival
Variable	Univariate			Multivariate*
	Hazard ratio	P value		Hazard ratio	P value
Tumor size (≥70mm/<70mm)	2.00 (0.86-4.66)	0.11		1.89 (0.81-4.40)	0.14
HPV genotype (non HPV16 or 18/HPV16 or 18)	2.32 (1.05-5.13)	0.038		2.24 (1.01-4.97)	0.048
*Stepwise multiple regression analysis
